# Supplementary material for: Effects of a very high saturated fat diet on LDL particles in adults with atherogenic dyslipidemia: A randomized controlled trial
Source: PubMed Central journal article supplement (PMC5293238; doi:10.1371/journal.pone.0170664), 2017-02-06
Supplement: pone.0170664.s005.pdf [file pone.0170664.s005.pdf]

**S1 Table:** Spearman's rho correlations of change in enzyme activities and change in lipid and lipoproteins<sup>1</sup>

|                            | $\Delta$ HL        | $\Delta$ LPL       | $\Delta$ CETP     |
|----------------------------|--------------------|--------------------|-------------------|
| $\Delta$ TG                | 0.35 <sup>a</sup>  | -0.34 <sup>a</sup> | 0.35 <sup>b</sup> |
| $\Delta$ TC                | 0.32 <sup>a</sup>  | 0.02               | 0.43 <sup>b</sup> |
| $\Delta$ LDL-C             | 0.16               | 0.20               | 0.26              |
| $\Delta$ HDL-C             | -0.14              | 0.09               | 0.00              |
| $\Delta$ NonHDL-C          | 0.35 <sup>a</sup>  | 0.01               | 0.41 <sup>b</sup> |
| $\Delta$ ApoB              | 0.36 <sup>a</sup>  | 0.01               | 0.41 <sup>b</sup> |
| $\Delta$ ApoAI             | 0.22               | 0.11               | 0.26              |
| $\Delta$ Total VLDL        | 0.35 <sup>a</sup>  | -0.19              | 0.33 <sup>a</sup> |
| $\Delta$ Large VLDL        | 0.40 <sup>b</sup>  | -0.36 <sup>a</sup> | 0.32 <sup>a</sup> |
| $\Delta$ Medium VLDL       | 0.31 <sup>a</sup>  | -0.20              | 0.31 <sup>a</sup> |
| $\Delta$ Small VLDL        | 0.18               | -0.14              | 0.29 <sup>a</sup> |
| $\Delta$ IDL               | 0.24               | 0.05               | 0.37 <sup>b</sup> |
| $\Delta$ Total LDL         | 0.26               | -0.12              | 0.40 <sup>b</sup> |
| $\Delta$ Large LDL         | -0.11              | 0.07               | 0.05              |
| $\Delta$ Medium LDL        | 0.15               | 0.03               | 0.31 <sup>a</sup> |
| $\Delta$ Small LDL         | 0.31 <sup>a</sup>  | -0.15              | 0.29 <sup>a</sup> |
| $\Delta$ Very small LDL    | 0.41 <sup>b</sup>  | -0.25              | 0.21              |
| $\Delta$ LDL peak diameter | -0.28 <sup>a</sup> | 0.20               | -0.20             |
| $\Delta$ Total HDL         | 0.24               | 0.01               | 0.26              |
| $\Delta$ Large HDL         | 0.16               | -0.06              | 0.16              |
| $\Delta$ Small HDL         | 0.26               | 0.05               | 0.25              |

<sup>1</sup> Difference in the log transformed values. <sup>a</sup> 0.05>p>0.01; <sup>b</sup> p<0.01. Apo, apolipoprotein; CETP, cholesteryl ester transfer protein; HL, hepatic lipase; HDL-C, HDL-cholesterol; IDL, intermediate density lipoprotein; LPL, lipoprotein lipase; LDL-C, LDL cholesterol; TC, total cholesterol; TG, triglycerides; VLDL, very low density lipoprotein.
